# Supplementary material
Source: PubMed Central journal article supplement (PMC4672379)
Supplement: NIHMS737967-supplement-1.pdf [file NIHMS737967-supplement-1.pdf]

Supplemental Data:

Figure S1, Related to Table 1: Detection of somatic Fragile X CGG expansions in Cases 1421, 4664, and 5006

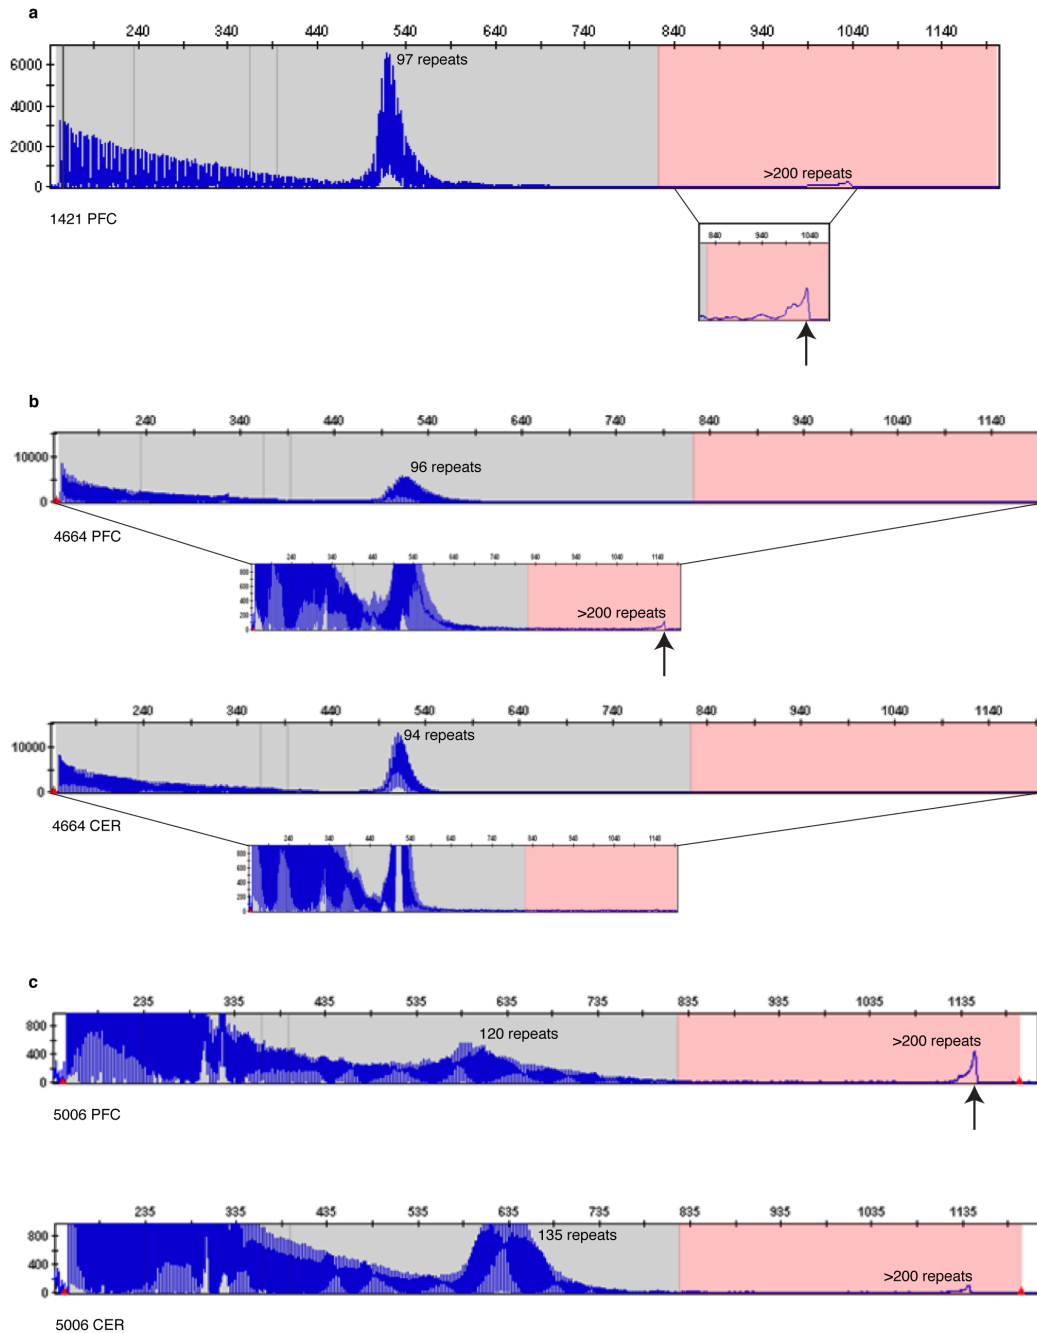

a. Case 1421 has both a premutation and full mutation peak in the PFC. b. Case 4664 has a premutation and a full mutation peak in the PFC, but only a premutation peak in the CER. Note that the test is not quantitative, since the smaller premutation peaks amplify more efficiently in PCR, so the relative proportion of premutation and full mutation cannot be determined by this method. c. Case 5006 has both a premutation and full mutation peak in the PFC and CER. Measured repeat number is noted above peaks. CER: cerebellum, PFC: prefrontal cortex.

**Table S3, Related to Figure 1: Comparison of variants identified in ASD cases and neurotypical controls**

|                  | Total number of mutations |                | Mutations per subject |                | Number of subjects with mutation |              | p Value <sup>a</sup> | Odds Ratio <sup>c</sup> (95% CI) |
|------------------|---------------------------|----------------|-----------------------|----------------|----------------------------------|--------------|----------------------|----------------------------------|
|                  | Cases                     | Controls       | Cases, N=55           | Controls, N=50 | Cases (%)                        | Controls (%) |                      |                                  |
| Silent           | 13                        | 13             | 0.24                  | 0.26           | 10 (18%)                         | 12 (24%)     | 0.483                | 0.70 (0.27 - 1.81)               |
| Protein-altering | 34                        | 15             | 0.62                  | 0.3            | 26 (47%)                         | 12 (24%)     | 0.015                | 2.84 (1.23 - 6.56)               |
| Deleterious      | 20                        | 5              | 0.36                  | 0.10           | 16 (29%)                         | 5 (10%)      | 0.016                | 3.69 (1.24 - 11.00)              |
| LOF              | 6                         | 0 <sup>b</sup> | 0.11                  | 0              | 6 (11%)                          | 0 (0%)       | 0.028                | N/A                              |

a: p Value was calculated using a two-sided Fisher's exact test

b: One control harbors a frameshift mutation that is not an exonic frameshift in all isoforms and is in an alternatively spliced exon considered noncritical for protein function. This mutation was not included in the LOF statistics.

c: The Odds Ratio is the ratio of cases with a type of mutation to cases without that type of mutation divided by the corresponding ratio in controls

CI: Confidence Interval

**Table S4, Related to Figure 1: NGS and subcloning details for potential somatic variants that did not validate**

| Case    | Gene            | Region | Chr | Position  | Ref | Alt | Total Reads | Alt Reads | NGS AAF(%) | Total Colonies | Alt Colonies | TOPO AAF (%) | p Value <sup>a</sup> (NGS vs TOPO) |
|---------|-----------------|--------|-----|-----------|-----|-----|-------------|-----------|------------|----------------|--------------|--------------|------------------------------------|
| 1474    | <i>ADNP</i>     | PFC    | 20  | 49508945  | C   | A   | 91          | 12        | 13.2       | 34             | 0            | 0            | 0.0353                             |
| 4899    | <i>AFF2</i>     | CER    | X   | 147743569 | C   | A   | 60          | 10        | 16.7       | 40             | 0            | 0            | 0.0054                             |
| AN00764 | <i>AGTR2</i>    | CER    | X   | 115303498 | G   | T   | 54          | 5         | 9.3        | 60             | 0            | 0            | 0.0215                             |
| 4231    | <i>AP1S2</i>    | PFC    | X   | 15845352  | G   | T   | 98          | 6         | 6.1        | 72             | 0            | 0            | 0.0394                             |
| 5144    | <i>AUTS2</i>    | PFC    | 7   | 69064653  | C   | A   | 51          | 3         | 5.9        | 93             | 0            | 0            | 0.0428                             |
| 4334    | <i>CACNA1H</i>  | PFC    | 16  | 1252038   | C   | A   | 66          | 8         | 12.1       | 39             | 0            | 0            | 0.0245                             |
| 5144    | <i>CHD8</i>     | PFC    | 14  | 21870426  | C   | A   | 194         | 10        | 5.2        | 89             | 0            | 0            | 0.0338                             |
| 5470    | <i>CHD8</i>     | PFC    | 14  | 21864011  | G   | T   | 158         | 20        | 12.7       | 27             | 0            | 0            | 0.0486                             |
| AN09714 | <i>FMR1</i>     | BA19   | X   | 147014095 | C   | A   | 45          | 6         | 13.3       | 46             | 0            | 0            | 0.0122                             |
| 818     | <i>FMR1</i>     | PFC    | X   | 147026517 | C   | A   | 86          | 10        | 11.6       | 40             | 0            | 0            | 0.0299                             |
| 5470    | <i>GABRB3</i>   | PFC    | 15  | 26793187  | G   | T   | 59          | 10        | 16.9       | 39             | 0            | 0            | 0.0054                             |
| 1712    | <i>GRIA3</i>    | PFC    | X   | 122599588 | C   | A   | 46          | 10        | 21.7       | 24             | 0            | 0            | 0.0124                             |
| 4672    | <i>GRIK2</i>    | PFC    | 6   | 102266296 | G   | T   | 103         | 12        | 11.7       | 39             | 0            | 0            | 0.0366                             |
| 5470    | <i>IL1RAPL1</i> | PFC    | X   | 29417297  | C   | A   | 79          | 16        | 20.3       | 24             | 0            | 0            | 0.0201                             |
| 5452    | <i>MDM2</i>     | PFC    | 12  | 69203068  | C   | A   | 74          | 12        | 16.2       | 30             | 0            | 0            | 0.0172                             |
| UK25363 | <i>NLGN3</i>    | PFC    | X   | 70375140  | G   | T   | 75          | 10        | 13.3       | 38             | 0            | 0            | 0.0157                             |
| 1499    | <i>PTCHD1</i>   | PFC    | X   | 23411323  | C   | A   | 80          | 11        | 13.8       | 34             | 0            | 0            | 0.0321                             |
| UK20244 | <i>SBF1</i>     | PFC    | 22  | 50906799  | A   | G   | 723         | 68        | 9.4        | 95             | 0            | 0            | 0.0002                             |
| 5408    | <i>SCN1A</i>    | PFC    | 2   | 166908288 | C   | A   | 87          | 10        | 11.5       | 39             | 0            | 0            | 0.0305                             |
| 5176    | <i>SCN2A</i>    | CER    | 2   | 166245181 | C   | A   | 46          | 6         | 13.0       | 80             | 0            | 0            | 0.0019                             |
| 5470    | <i>SCN2A</i>    | PFC    | 2   | 166153564 | G   | A   | 63          | 12        | 19.0       | 26             | 0            | 0            | 0.0157                             |
| 5027    | <i>SCN2A</i>    | CER    | 2   | 166231195 | G   | T   | 92          | 12        | 13.0       | 33             | 0            | 0            | 0.0350                             |
| M3746M  | <i>SETD2</i>    | PFC    | 3   | 47161989  | G   | T   | 65          | 8         | 12.3       | 56             | 0            | 0            | 0.0072                             |
| 5027    | <i>SLC9A6</i>   | CER    | X   | 135080718 | G   | T   | 77          | 16        | 20.8       | 23             | 0            | 0            | 0.0195                             |
| 967     | <i>SYN1</i>     | PFC    | X   | 47464767  | G   | A   | 220         | 10        | 4.5        | 91             | 0            | 0            | 0.0376                             |
| 5297    | <i>TSC2</i>     | CER    | 16  | 2135991   | C   | T   | 526         | 15        | 2.9        | 154            | 0            | 0            | 0.0290                             |

a: p value comparing NGS read counts to TOPO counts calculated using a two-tailed Fisher's exact test  
BA19: Brodmann Area 19, CER: cerebellum, PFC: prefrontal cortex

**Table S5, Related to Figure 1: NGS and subcloning details for validated somatic variants**

| Case    | Gene           | Region | Total Reads | Alt Reads | NGS AAF (%) | p Value <sup>a</sup> (50%) | Total Colonies | Alt Colonies | TOPO AAF (%) | p Value <sup>b</sup> (50%) |
|---------|----------------|--------|-------------|-----------|-------------|----------------------------|----------------|--------------|--------------|----------------------------|
| 5006    | <i>CACNA1C</i> | PFC    | 160         | 67        | 41.88       | 1.78E-01                   | 94             | 31           | 32.98        | 2.61E-02                   |
|         |                | CER    | 157         | 68        | 43.31       | 2.59E-01                   | 212            | 88           | 41.75        | 4.87E-02 <sup>c</sup>      |
| 5378    | <i>CACNA1H</i> | PFC    | 1776        | 89        | 5.02        | 2.13E-220                  | 95             | 2            | 2.11         | 1.20E-15                   |
| 5278    | <i>SCN1A</i>   | PFC    | 355         | 115       | 32.39       | 2.16E-06                   | 775            | 367          | 47.35        | 1.61E-01 <sup>c</sup>      |
|         |                | CER    | 623         | 234       | 37.56       | 1.08E-05                   | 781            | 357          | 45.71        | 4.98E-02 <sup>c</sup>      |
| UK20244 | <i>SETD2</i>   | PFC    | 171         | 28        | 16.37       | 3.05E-11                   | 132            | 35           | 26.52        | 1.34E-04                   |
| 967     | <i>SLC6A4</i>  | CER    | 333         | 54        | 16.22       | 7.21E-21                   | 24             | 1            | 4.17         | 6.99E-04                   |

a: p value comparing NGS read counts to expected reads counts for a heterozygous mutation calculated using a two-tailed Fisher's exact test

b: p value comparing TOPO counts to expected counts for a heterozygous mutation calculated using a two-tailed Fisher's exact test (except where noted)

c: p value calculated using a one-tailed Fisher's exact test

CER: cerebellum, PFC: prefrontal cortex

**Table S6, Related to Figure 2: Distribution of somatic variants identified**

| Case    | Diagnosis                                      | Gene           | Mut              | Chr | Pos       | Ref | Alt | Brain AAF            | Brain Mutant Cell Frequency | Non-brain AAF |
|---------|------------------------------------------------|----------------|------------------|-----|-----------|-----|-----|----------------------|-----------------------------|---------------|
| 5278    | Autism                                         | <i>SCN1A</i>   | Sp               | 2   | 166911147 | C   | T   | PFC: 32.4-47.4%      | PFC: 65-95%                 | Liver: 46.7%  |
|         |                                                |                |                  |     |           |     |     | CER: 37.6-45.7%      | CER: 75-91%                 | Serum: 46.3%  |
|         |                                                |                |                  |     |           |     |     | PAR: 42.6%           | PAR: 85%                    |               |
|         |                                                |                |                  |     |           |     |     | MED: 44.3%           | MED: 89%                    |               |
| UK20244 | Autism                                         | <i>SETD2</i>   | Ms               | 3   | 47144882  | G   | C   | PFC: 16.4-26.5 %     | PFC: 33-53%                 | N/A           |
|         |                                                |                |                  |     |           |     |     | CER: 0%              | CER: 0%                     |               |
| 5006    | Fragile X, premutation                         | <i>CACNA1C</i> | St               | 12  | 2162730   | T   | C   | PFC: 33-42%          | PFC: 66-84%                 |               |
|         |                                                |                |                  |     |           |     |     | CER: 42-43%          | CER: 84-86%                 |               |
| 5378    | ASD/Autism Sibling,<br>Social Anxiety Disorder | <i>CACNA1H</i> | Syn <sup>a</sup> | 16  | 1268542   | G   | A   | PFC: 2-5%            | PFC: 4-10%                  |               |
|         |                                                |                |                  |     |           |     |     | CER: 0% <sup>b</sup> | CER: 0%                     |               |
| 967     | ASD/Autism, suspected                          | <i>SLC6A4</i>  | In               | 17  | 28546044  | G   | A   | PFC: 0%              | PFC: 0%                     | Dura: 0%      |
|         |                                                |                |                  |     |           |     |     | CER: 4-16%           | CER: 8-32%                  |               |

a: rs60526088

b: 5378 CER had 2/1793 reads with A at this position (0.1%). Given that the expected base miscall rate is 0.1% (Shirley et al., 2013), that 5378 PFC has 2/1776 reads with C at this position (0.1%) and an additional 2/1776 reads with T at this position (0.1%), and that validation did not identify the alternate base in 5378 CER, we believe it is most likely a sequencing error.

CER: cerebellum, In: Intronic, MED: medulla, Ms: Missense, PAR: parietal cortex, PFC: prefrontal cortex, Sp: Splicing, St: Start Lost, Syn: Synonymous

## Supplemental Experimental Procedures

### Gene selection and panel design

The ASD candidate gene panel was designed to balance including a sufficient number of genes with achieving the depth necessary to detect low-frequency somatic mutations. Given the hundreds of candidate genes reported, we included genes with strongest evidence of association with ASD. We included genes from three sources, focusing on genes whose disease mechanisms involve dominant or X-linked modes of inheritance, as these are associated with higher *de novo* mutation rates. First, a recent study performed targeted sequencing on DNA from 2,446 individuals with ASD to identify recurrently mutated genes; we included all 44 genes used in their targeted panel (O’Roak et al., 2012). Second, we included X-linked genes associated with ASD as reviewed by Betancur (Betancur, 2011). Third, we included dominant and X-linked genes with strong evidence of association with ASD curated by the Simons Foundation Autism Research Initiative (SFARI) database (Basu et al., 2009). Overall, the panel comprises 78 genes, generating a target region of 279kb that includes all exons, exon-intron boundaries, and 10bp of flanking sequence for each gene. The design, created using SureDesign (Agilent), is predicted to cover 99.7% of the target region.

Genes included in targeted panel:

|         |          |         |
|---------|----------|---------|
| ACSL4   | EN2      | PTCHD1  |
| ADCY5   | FGD1     | PTEN    |
| ADNP    | FMR1     | RAB39B  |
| AFF2    | FOXP2    | RAI1    |
| AGTR2   | FTSJ1    | RBFOX1  |
| AP1S2   | GABRB3   | SBF1    |
| ARHGEF6 | GRIA3    | SCN1A   |
| ARID1B  | GRIK2    | SCN2A   |
| ARX     | GRIN2A   | SEMA5A  |
| ASTN2   | GRIN2B   | SETD2   |
| ATP10A  | HOXA1    | SGSM3   |
| ATRX    | IL1RAPL1 | SHANK3  |
| AUTS2   | IQSEC2   | SLC6A4  |
| CACNA1C | KDM5C    | SLC6A8  |
| CACNA1H | LAMB1    | SLC9A6  |
| CASK    | MDM2     | SYN1    |
| CDKL5   | MECP2    | SYNGAP1 |
| CHD8    | MET      | TBL1XR1 |
| CNOT4   | NLGN1    | TBR1    |
| CNTN4   | NLGN3    | TSC1    |
| CNTNAP2 | NLGN4X   | TSC2    |
| CTNNA1  | NTNG1    | UBE3A   |
| DISC1   | OXTR     | UBE3C   |
| DLX2    | PON1     | UPF3B   |
| DPP6    | PQBP1    | ZNF674  |
| DYRK1A  | PSEN1    | ZNF81   |

### DNA library preparation and next generation sequencing

Paired-end, barcoded libraries were prepared per the manufacturer’s protocol with 225ng of DNA from each sample using a custom Haloplex Target Enrichment Kit (Agilent). Paired-end sequencing (250bp x 2 or 150bp x 2) was performed on MiSeq sequencers (Illumina) at the DNA Diagnostic Laboratory (now

Claritas Genomics) at Boston Children's Hospital or the Harvard BioPolymers Facility. Sequencing was performed in batches to achieve a higher read depth for each sample to optimize detection of low-frequency somatic variants.

### **DNA sequencing data analysis**

Raw read data was processed and mapped using BWA (Li and Durbin, 2009) and SNV and insertion and/or deletion (indel) calling was performed using SAMtools (Li et al., 2009) and SNPPEP (Agilent), using the Surecall software (Agilent). For cases where two brain regions were sequenced, MuTect (Cibulskis et al., 2013) was used to compare the regions for mutations that were present in one region but not the other, and vice versa. Variants were quality filtered to exclude false positives according to standard thresholds (quality < 30, coverage < 10X and clustered variants (window size of 10)). For somatic variants, after initial validation experiments resulted in many false positives, filtering was adjusted to alternate allele frequency < 40%, coverage  $\geq$  60X and alternate allele read depth  $\geq$  10X. The first and last five base pairs of every read were removed from read count calculations due to bias resulting from the restriction enzyme step in library preparation. Data from the Exome Sequencing Project (<http://evs.gs.washington.edu/EVS/>), dbSNP 137 and 142 (Sherry et al., 2001), and 1000 Genomes Project (Abecasis et al., 2012) were used to assess variant frequencies in control populations. We excluded variants present in dbSNP or with MAF  $\geq$  1% in EVS or 1000 Genomes. Previously reported mutations were identified using the Human Gene Mutation Database (Stenson et al., 2014). We used Provean (Choi et al., 2012), Sift (Ng and Henikoff, 2003), Polyphen 2 (Adzhubei et al., 2010), and CADD (Kircher et al., 2014) to assess for deleteriousness. We considered a variant to be loss-of-function if it was a nonsense, frameshift, or splicing variant, and we considered a variant to be deleterious if it was predicted as such by at least three of Provean (deleterious), Sift (damaging), Polyphen-2 (probably damaging or possibly damaging), and CADD (phred score  $\geq$  20).

### **RNA extraction and quality assessment**

Total RNA was extracted using mirVana kit (Ambion) with some modifications to the manufacturer's protocol. Each tissue sample was pulverized with liquid nitrogen in a prechilled mortar and pestle and transferred to a chilled safe-lock microcentrifuge tube (Eppendorf). Per tissue mass, equal mass of chilled stainless steel beads (Next Advance, catalog # SSB14B) along with one volume of lysis/binding buffer were added. Tissue was homogenized for 1 min in Bullet Blender (Next Advance) and incubated at 37°C for 1 min. Another nine volumes of the lysis/binding buffer were added, homogenized for 1 min, and incubated at 37°C for 2 min. One-tenth volume of miRNA Homogenate Additive was added and extraction was carried out according to the manufacturer's protocol. RNA was treated with DNase using TURBO DNA-free Kit (Ambion/ Life Technologies) and RNA integrity was measured using Agilent 2200 TapeStation System.

### **RNA library preparation and next generation sequencing**

Barcoded libraries for RNA-seq were prepared with 5ng of RNA using TruSeq Stranded Total RNA with Ribo-Zero Gold kit (Illumina) per manufacturer's protocol. Paired-end sequencing (76bp x 2) was performed on HiSeq 2000 sequencers (Illumina) at Yale Center for Genome Analysis.

### **RNA-seq data analysis**

The sequenced reads were processed and filtered for quality prior to alignment. First, the first base from both ends was trimmed to remove potential primer contamination. Filtered reads were aligned to hg19 (GRCh37) genome using Tophat (version 2.0.12) (Trapnell et al., 2009) Reads that were not uniquely mapped were excluded from further analysis. Gene expression levels were measured in RPKM (reads per kilobase of exon model per million mapped reads (Mortazavi et al., 2008)) using HTSeq (Anders et al., 2015) and SAMtools (Li et al., 2009). Briefly, the BAM format alignment was first converted into SAM format alignment by using the "view" function in SAMtools. Then, the "htseq-count" function in HTSeq was used to count reads mapped to genes annotated in GENCODE (version 19) (<http://www.gencodegenes.org/>) (Harrow et al., 2012). We ran "htseq-count" function twice with different  $-t$  parameters, *i.e.*, exon and gene, so as to infer reads mapped to exon and gene, and reads different between them were mapped to introns. For each gene, a composite model of the gene (union of all exons across all transcripts of gene) was created from GENCODE (version 19) annotation, all reads overlapping this model were counted and

normalized per million mapped nucleotides and the length of the annotation item per kb to get RPKM values.

To identify differences in gene expression, we compared RNA-seq data from ASD specimens with RNA-seq data from matched neurotypical postmortem human brain specimens, which we generated as part of the BrainSpan consortium ([www.brainspan.org](http://www.brainspan.org)). Each ASD sample was compared with the same region from two control samples matched closely for age and sex. Due to differences in sample and library preparations between BrainSpan controls (polyA enriched RNA was single end sequenced) and ASD samples (total RNA depleted of ribosomal RNA was paired end sequenced), several processing steps were carried out. Genes from sex chromosomes and non-coding genes were also excluded from differential expression analysis to avoid sex-bias and because BrainSpan controls do not have complete coverage of non-coding genes due to poly A enriched library preparation. The RPKM values of autosomal protein-coding genes in 6 ASD samples and 12 matched controls were pooled together to construct expression matrix, from which genes with Q3 (upper quartile) RPKM values less than 1 were filtered out, leaving 19431 protein-coding genes. Then using “normalizeBetweenArrays” function in “limma” R Bioconductor (Smyth, 2005), the log<sub>2</sub> transformed gene (RPKM+1e-5) values were quantile normalized. Combat (Johnson et al., 2007) was then used to correct the batch effect between samples, as well as using region and ethnicity as covariance factors. The differential gene expression analyses were based on these corrected and normalized gene expression values.

Genes with high fold differences in expression were identified by comparing ASD samples with each control sample. To be considered to have expression differences, a gene was required to have RPKM value greater than 1 in at least one sample and absolute fold-change greater than 2. To get the most confident list of genes, only those genes that were detected as potentially differentially expressed with both control samples and which had fold changes in the same direction were considered.



## Supplemental References

- Abecasis, G.R., Auton, A., Brooks, L.D., DePristo, M.A., Durbin, R.M., Handsaker, R.E., Kang, H.M., Marth, G.T., and McVean, G.A. (2012). An integrated map of genetic variation from 1,092 human genomes. *Nature* 491, 56-65.
- Adzhubei, I.A., Schmidt, S., Peshkin, L., Ramensky, V.E., Gerasimova, A., Bork, P., Kondrashov, A.S., and Sunyaev, S.R. (2010). A method and server for predicting damaging missense mutations. *Nature methods* 7, 248-249.
- Anders, S., Pyl, P.T., and Huber, W. (2015). HTSeq--a Python framework to work with high-throughput sequencing data. *Bioinformatics* 31, 166-169.
- Choi, Y., Sims, G.E., Murphy, S., Miller, J.R., and Chan, A.P. (2012). Predicting the functional effect of amino acid substitutions and indels. *PLoS one* 7, e46688.
- Cibulskis, K., Lawrence, M.S., Carter, S.L., Sivachenko, A., Jaffe, D., Sougnez, C., Gabriel, S., Meyerson, M., Lander, E.S., and Getz, G. (2013). Sensitive detection of somatic point mutations in impure and heterogeneous cancer samples. *Nature biotechnology* 31, 213-219.
- Harrow, J., Frankish, A., Gonzalez, J.M., Tapanari, E., Diekhans, M., Kokocinski, F., Aken, B.L., Barrell, D., Zadissa, A., Searle, S., *et al.* (2012). GENCODE: the reference human genome annotation for The ENCODE Project. *Genome research* 22, 1760-1774.
- Johnson, W.E., Li, C., and Rabinovic, A. (2007). Adjusting batch effects in microarray expression data using empirical Bayes methods. *Biostatistics* 8, 118-127.
- Kircher, M., Witten, D.M., Jain, P., O'Roak, B.J., Cooper, G.M., and Shendure, J. (2014). A general framework for estimating the relative pathogenicity of human genetic variants. *Nature genetics* 46, 310-315.
- Li, H., and Durbin, R. (2009). Fast and accurate short read alignment with Burrows-Wheeler transform. *Bioinformatics* 25, 1754-1760.
- Li, H., Handsaker, B., Wysoker, A., Fennell, T., Ruan, J., Homer, N., Marth, G., Abecasis, G., and Durbin, R. (2009). The Sequence Alignment/Map format and SAMtools. *Bioinformatics* 25, 2078-2079.
- Mortazavi, A., Williams, B.A., McCue, K., Schaeffer, L., and Wold, B. (2008). Mapping and quantifying mammalian transcriptomes by RNA-Seq. *Nature methods* 5, 621-628.
- Ng, P.C., and Henikoff, S. (2003). SIFT: Predicting amino acid changes that affect protein function. *Nucleic acids research* 31, 3812-3814.
- Sherry, S.T., Ward, M.H., Kholodov, M., Baker, J., Phan, L., Smigielski, E.M., and Sirotkin, K. (2001). dbSNP: the NCBI database of genetic variation. *Nucleic acids research* 29, 308-311.
- Shirley, M.D., Tang, H., Gallione, C.J., Baugher, J.D., Frelin, L.P., Cohen, B., North, P.E., Marchuk, D.A., Comi, A.M., and Pevsner, J. (2013). Sturge-Weber syndrome and port-wine stains caused by somatic mutation in GNAQ. *The New England journal of medicine* 368, 1971-1979.
- Smyth GK (2005). limma: Linear Models for Microarray Data. In *Bioinformatics and Computational Biology Solutions Using R and Bioconductor Statistics for Biology and Health*, Robert Gentleman *et al.*, ed. (Springer New York), pp. 397-420.
- Stenson, P.D., Mort, M., Ball, E.V., Shaw, K., Phillips, A., and Cooper, D.N. (2014). The Human Gene Mutation Database: building a comprehensive mutation repository for clinical and molecular genetics, diagnostic testing and personalized genomic medicine. *Human genetics* 133, 1-9.
- Trapnell, C., Pachter, L., and Salzberg, S.L. (2009). TopHat: discovering splice junctions with RNA-Seq. *Bioinformatics* 25, 1105-1111.
